# Supplementary material for: Tuning the pH Response of Monolayer Hexagonal Boron Nitride/Graphene Field-Effect Transistors
Source: Research Square preprint supplement (doi:10.21203/rs.3.rs-2597040/v1), 2023-02-23
Supplement: Supplementary file 1 [file 637db59baf02938d2751bbe0.pdf]

## Supporting Information

# Tuning the pH Response of Monolayer Hexagonal Boron Nitride/Graphene Field-Effect Transistors

Nicholas E. Fuhr <sup>a,\*</sup>, Mohamed Azize <sup>a</sup>, David J. Bishop <sup>a,b,c,d,e</sup>

<sup>a</sup> *Division of Materials Science and Engineering, Boston University, Boston, Massachusetts 02115, United States*

<sup>b</sup> *Department of Mechanical Engineering, Boston University, Boston, Massachusetts 02115, United States*

<sup>c</sup> *Department of Electrical and Computer Engineering, Boston University, Boston, Massachusetts 02115, United States*

<sup>d</sup> *Department of Biomedical Engineering, Boston University, Boston, Massachusetts 02115, United States*

<sup>e</sup> *Department of Physics, Boston University, Boston, Massachusetts 02115, United States*

\* Correspondence: [fuhrnick@bu.edu](mailto:fuhrnick@bu.edu)

| <b>Table of Contents</b> | <b>Page no.</b> |
|--------------------------|-----------------|
| Figure S1                | S3              |
| Figure S2                | S4              |
| Figure S3                | S5              |
| Figure S4                | S6              |
| Figure S5                | S7              |
| Figure S6                | S8              |
| Figure S7                | S9              |
| Figure S8                | S10             |
| Figure S9                | S11             |
| Figure S10               | S12             |

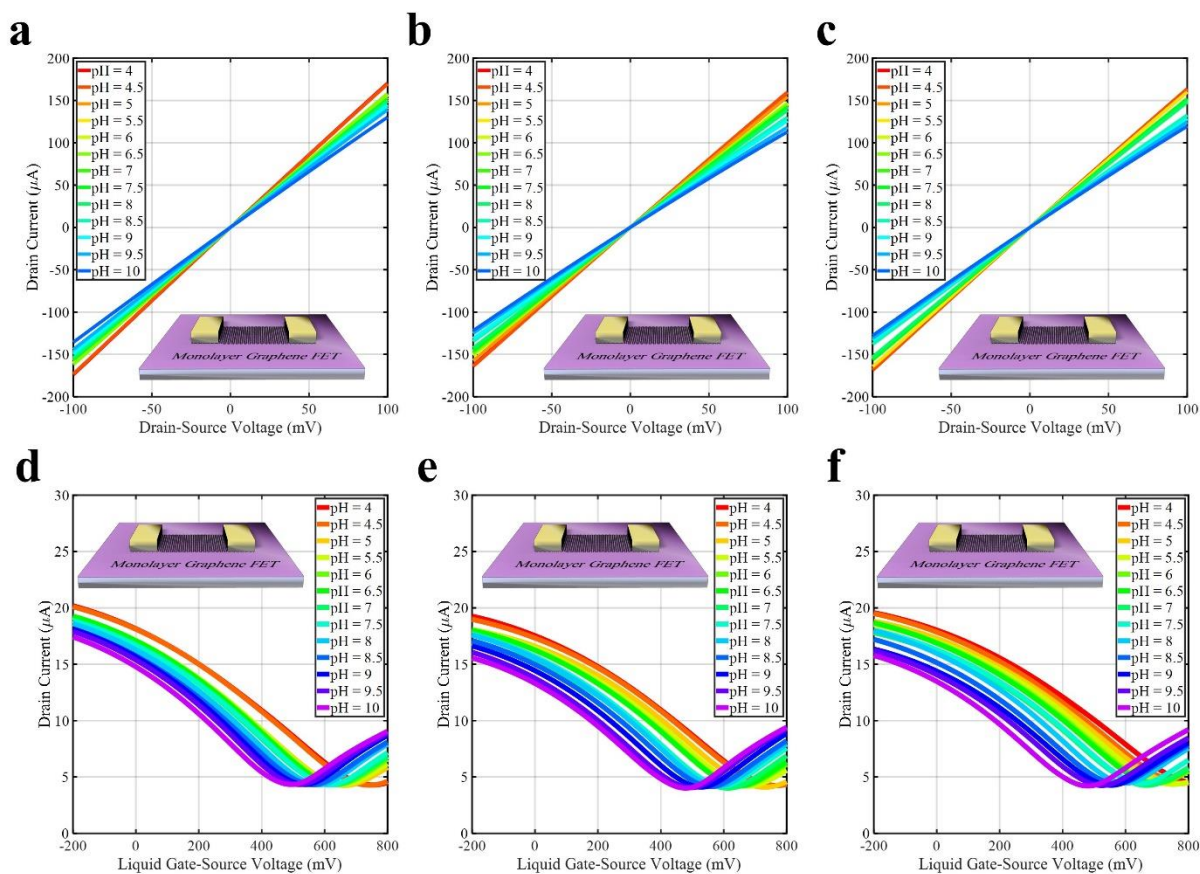

**Figure S1.** Raw electrical data for monolayer graphene/SiO<sub>2</sub> as a function of 10 mM phosphate solution pH where two-terminal (a-c) and liquid-gated three-terminal (d-f) measurements were used to extract resistances and Dirac voltages. Insets are computer generated graphics of the monolayer graphene field-effect transistor.

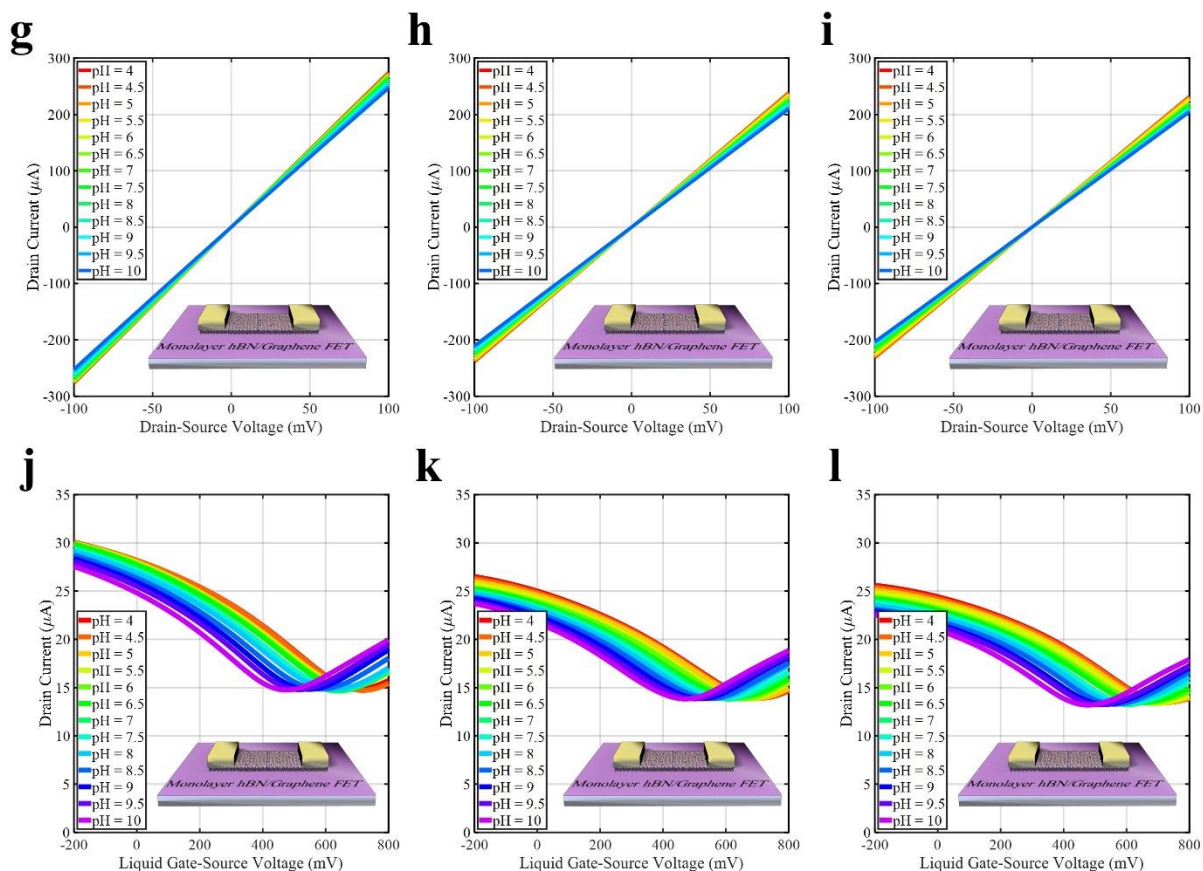

**Figure S2.** Raw electrical data for hBN/graphene/SiO<sub>2</sub> as a function of 10 mM phosphate solution pH where two-terminal (a-c) and liquid-gated three-terminal (d-f) measurements were used to extract resistances and Dirac voltages. Insets are computer generated graphics of the monolayer hBN/graphene field-effect transistor. For the three-terminal measurements, the drain-source bias was 10 mV.

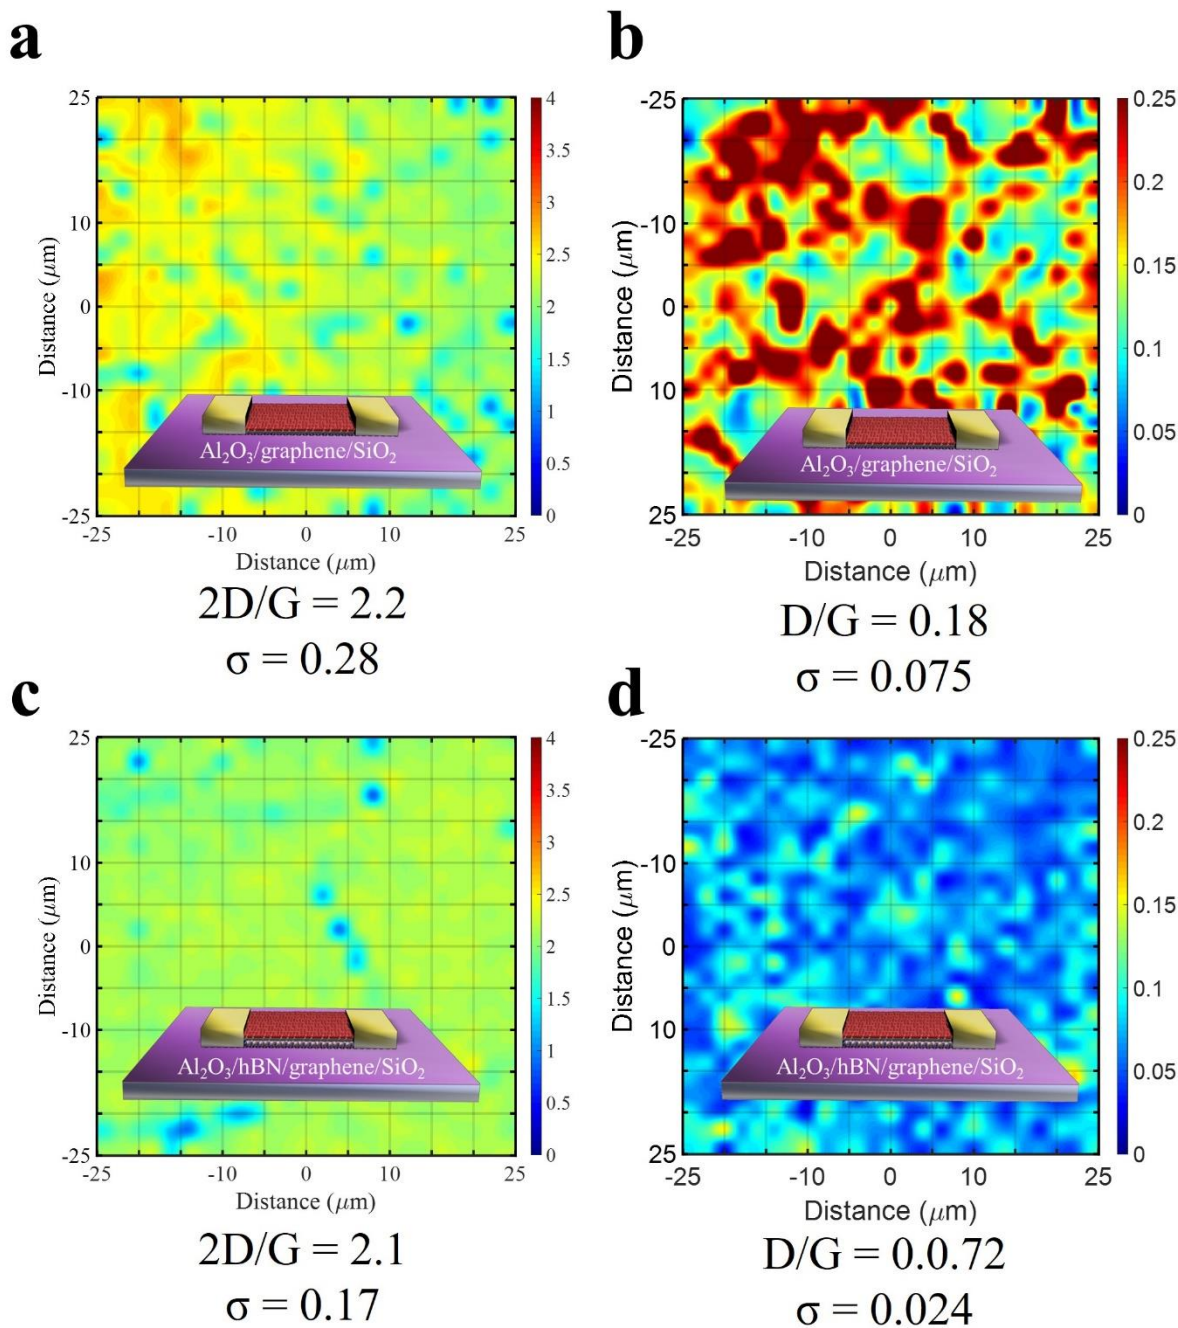

**Figure S3.** Raman spectral maps were used to extract the 2D/G and D/G phonon intensity ratios of 9 nm of  $\text{Al}_x\text{O}_y$  from electron beam deposition on graphene/ $\text{SiO}_2$  (**a**, **b**) and hBN/graphene/ $\text{SiO}_2$  (**c**, **d**). Insets are computer generated graphics of an  $\text{Al}_x\text{O}_y$  film on the 2D devices.



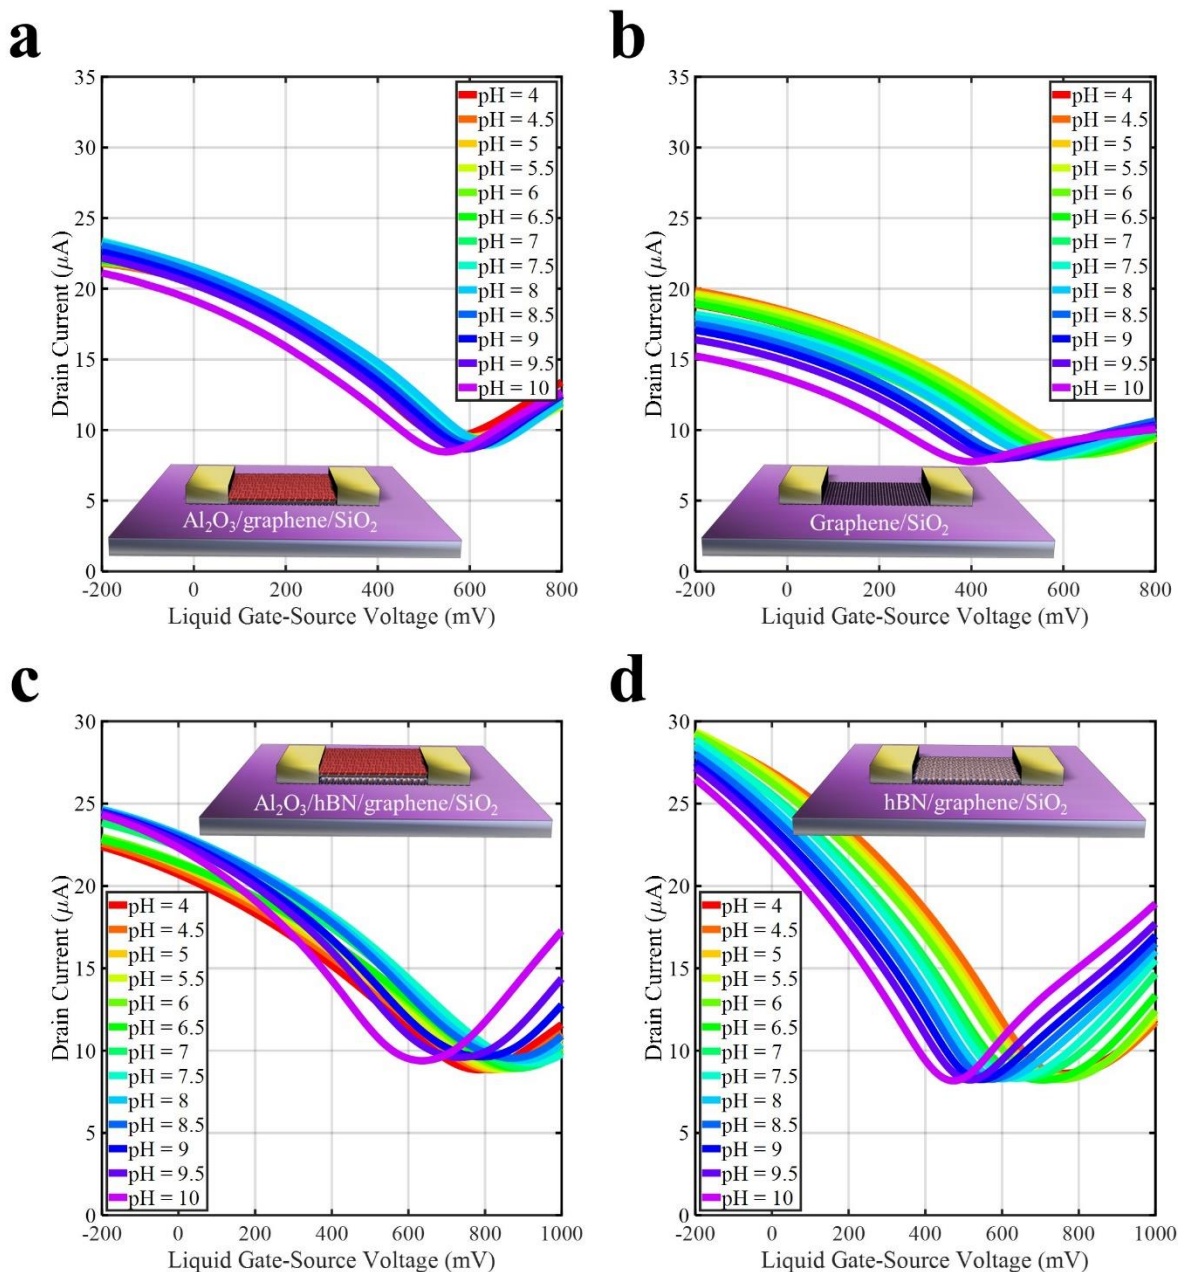

**Figure S4.** Raw data for liquid-gated transfer characteristics of 9 nm of  $\text{Al}_2\text{O}_3$  from electron beam deposition before and after basic wet etching on  $\text{graphene}/\text{SiO}_2$  (a, b) and  $\text{hBN}/\text{graphene}/\text{SiO}_2$  (c, d). Insets are computer generated graphics of an  $\text{Al}_x\text{O}_y$  film on the 2D devices before etching, and its removal after etching. Drain-source bias was 10 mV.

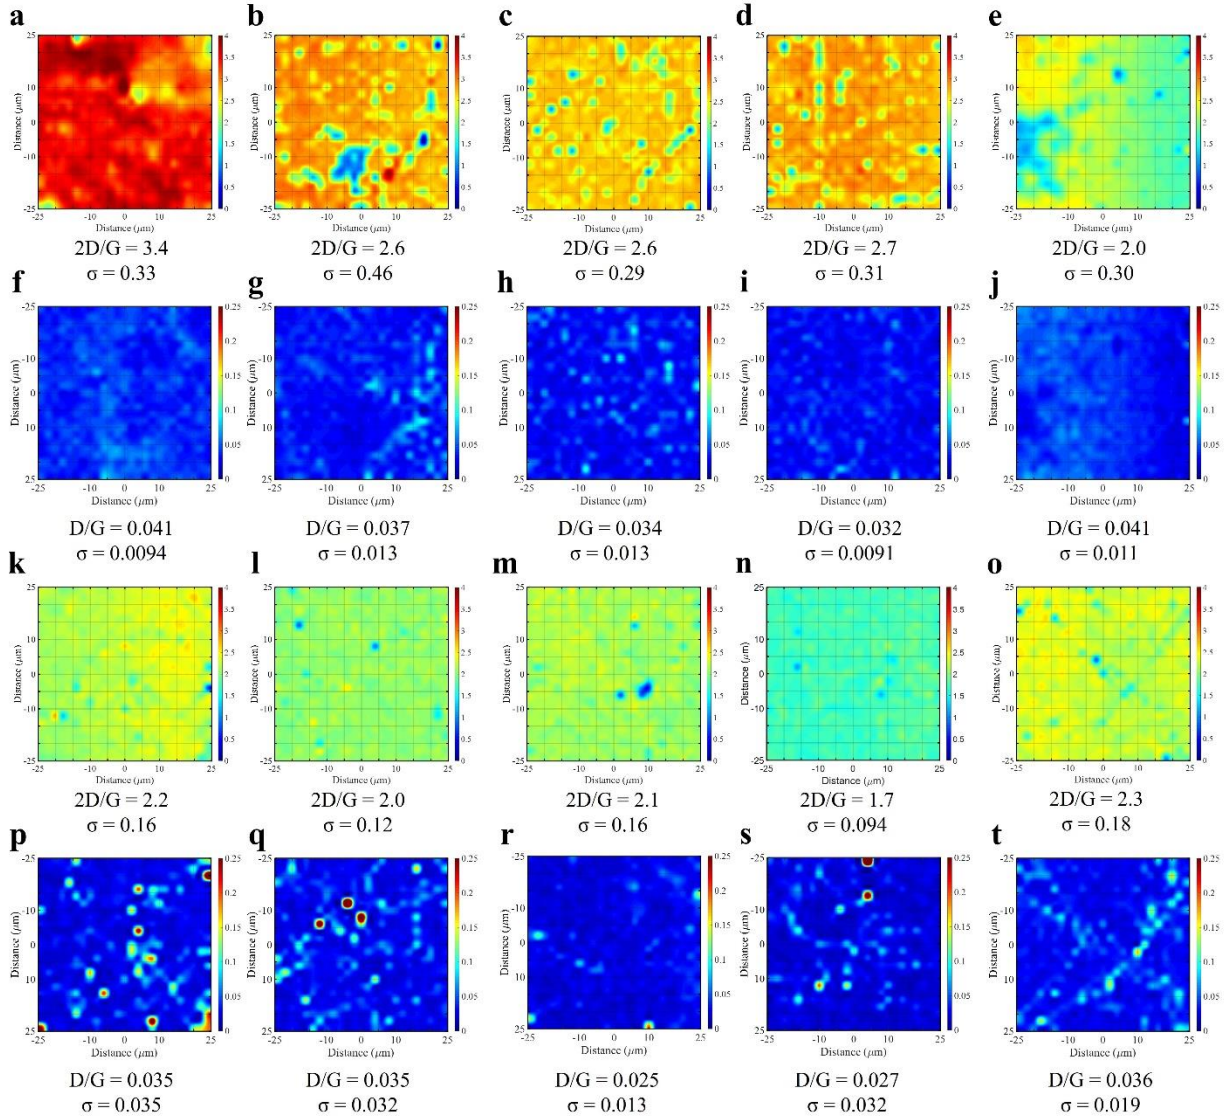

**Figure S5.** Raman spectral maps were used to extract the 2D/G and D/G phonon intensity ratios as a function of atomic layer deposition thickness of  $\text{Al}_x\text{O}_y$  on graphene/ $\text{SiO}_2$  (a-o) and hBN/graphene/ $\text{SiO}_2$  (k-t). The thicknesses of  $\text{Al}_x\text{O}_y$  used here, from left to right, are: 0, 4.3, 8.6, 12.3, and 23.0 nm. The 2D/G and D/G ratios and their standard deviations for 625 measurements over the sample surface are displayed below the Raman spectral maps.

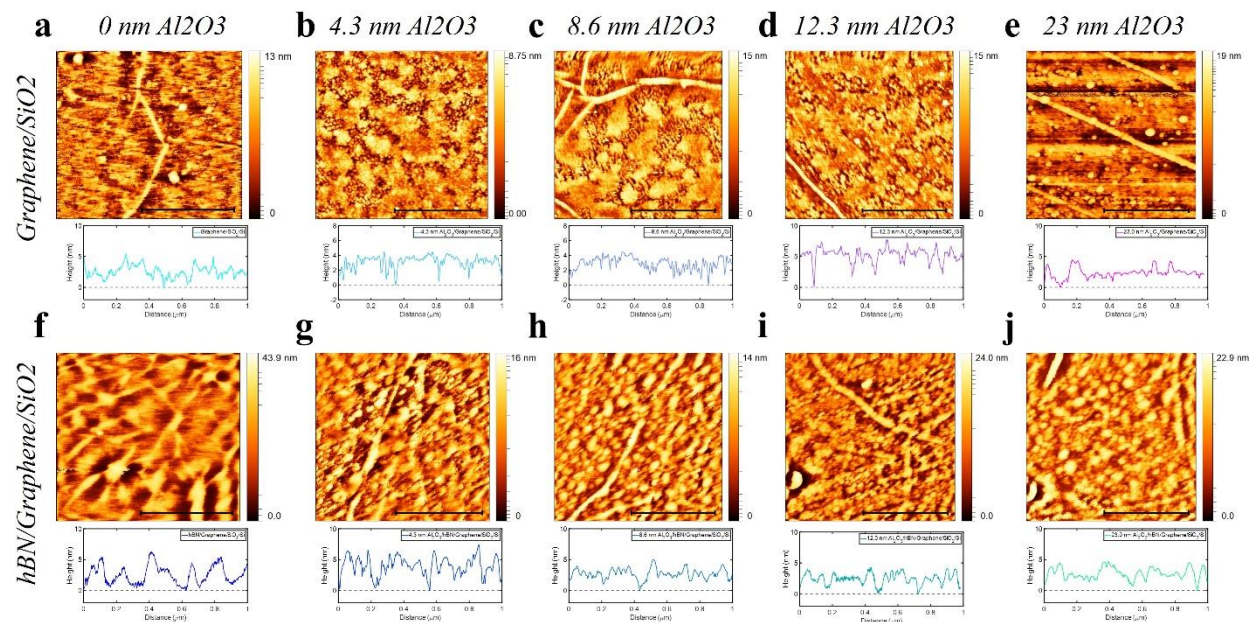

**Figure S6.** Atomic force microscopy as a function of the thickness of atomic layer deposition of  $Al_xO_y$  on graphene/SiO<sub>2</sub> (**a-e**) and hBN/graphene/SiO<sub>2</sub> (**f-j**). One-dimensional profiles are extracted and plotted directly below the AFM topography.



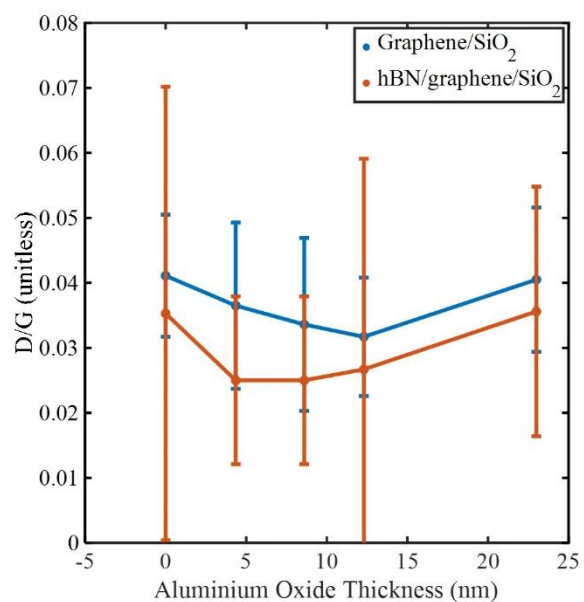

**Figure S7.** Average D/G ratios from the Raman spectral mapping of atomic layer deposition of  $\text{Al}_x\text{O}_y$  on either graphene/ $\text{SiO}_2$  (blue) or hBN/graphene/ $\text{SiO}_2$  (red). The standard deviations of the D/G ratios were used as error bars.

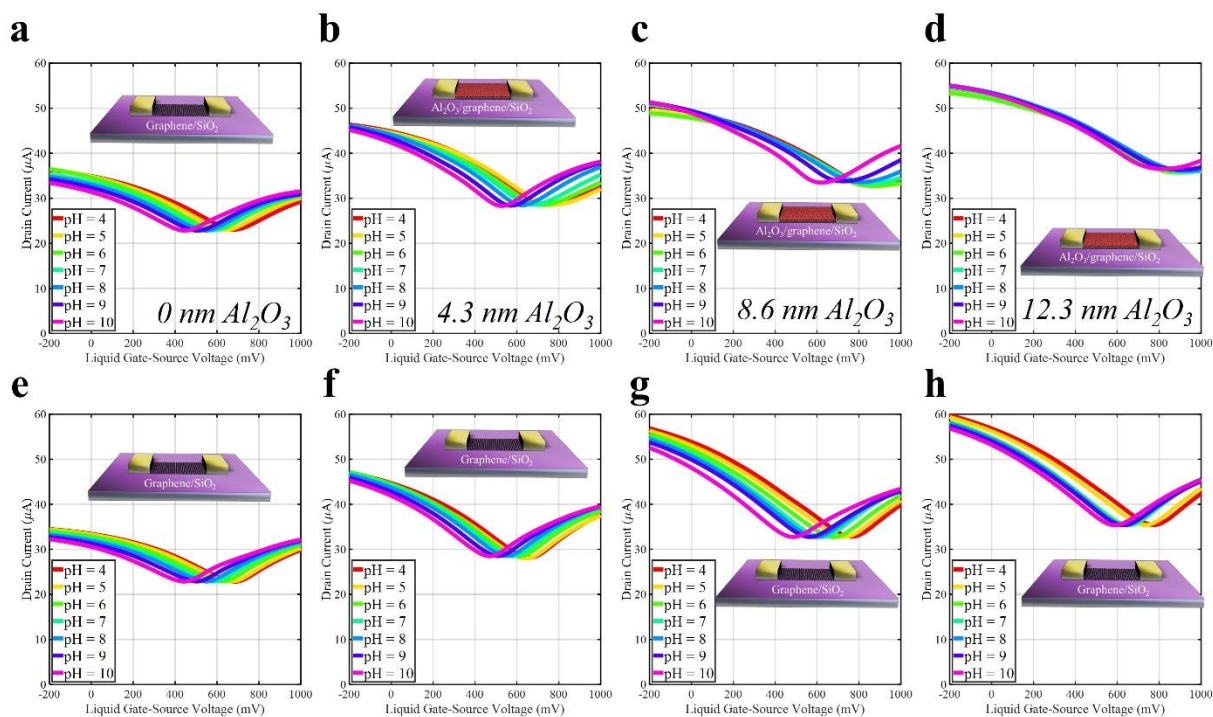

**Figure S8.** Raw data for liquid-gated transfer characteristics of atomic layer deposition of  $\text{Al}_x\text{O}_y$  on graphene/ $\text{SiO}_2$ . (a-d) are the devices three-terminal response before basic wet etching, whereas (e-h) are the devices after basic wet etching. Insets are computer generated graphics of the device state: with or without the  $\text{Al}_x\text{O}_y$  nanofilm. Drain-source bias was 10 mV.

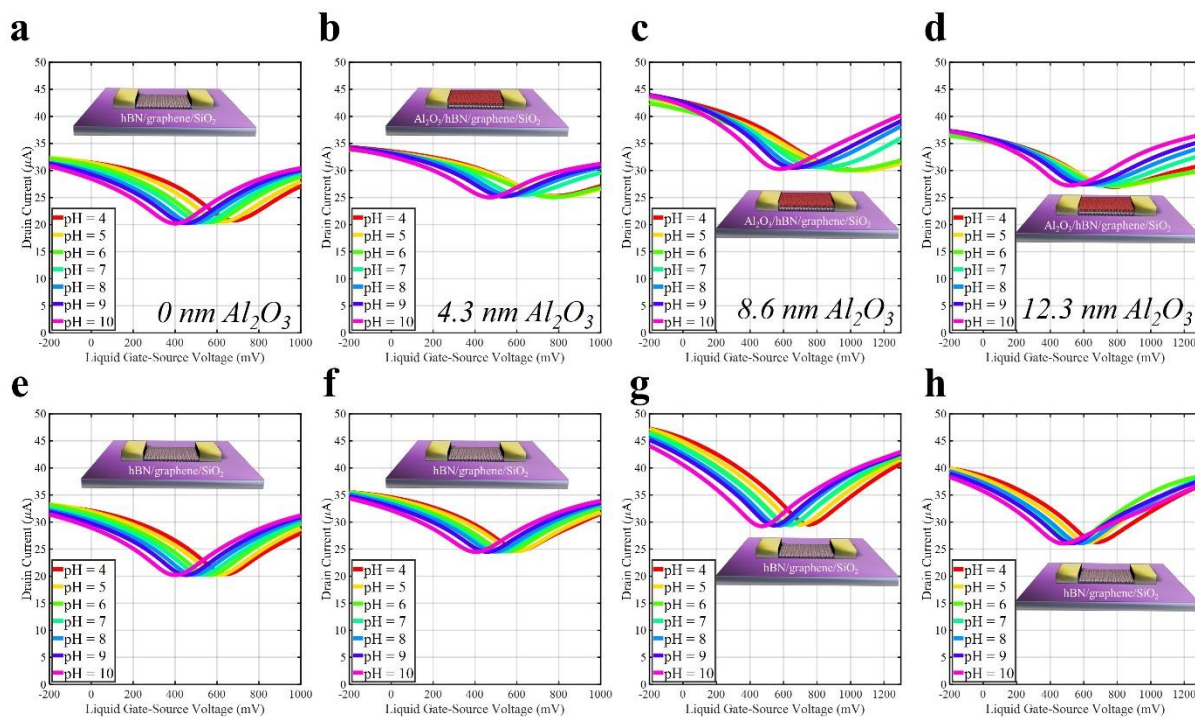

**Figure S9.** Raw data for liquid-gated transfer characteristics of atomic layer deposition of  $\text{Al}_x\text{O}_y$  on hBN/graphene/ $\text{SiO}_2$ . (a-d) are the devices three-terminal response before basic wet etching, whereas (e-h) are the devices after basic wet etching. Insets are computer generated graphics of the device state: with or without the  $\text{Al}_x\text{O}_y$  nanofilm. Drain-source bias was 10 mV.

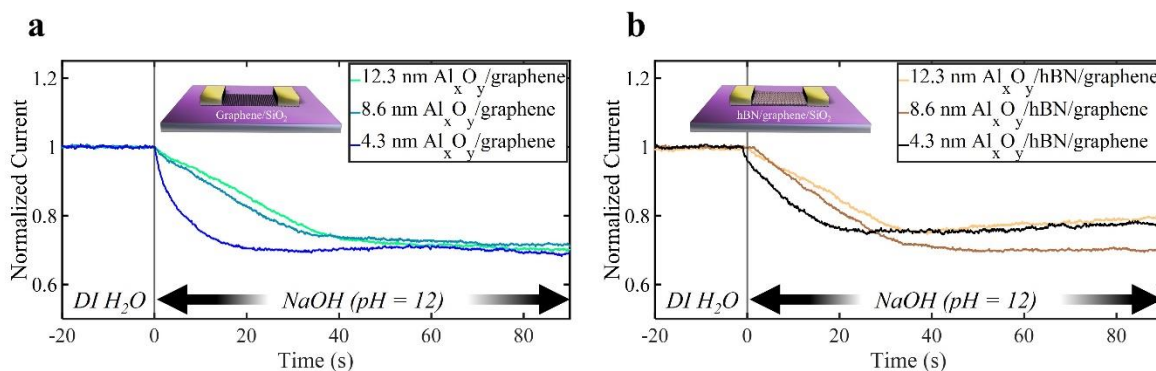

**Figure S10.** Chronoamperometry of various thicknesses of ALD Al<sub>x</sub>O<sub>y</sub> on separate (a) graphene/SiO<sub>2</sub> and (b) monolayer hBN/graphene/SiO<sub>2</sub> field effect transistors. Drain-source bias was 10 mV and current is normalized by the current at 0 seconds. Time less than 0 seconds are the devices operating under 25  $\mu\text{L}$  of deionized water. At 0 seconds, 50  $\mu\text{L}$  of aqueous NaOH (pH = 12) was added. The ALD thicknesses of Al<sub>x</sub>O<sub>y</sub> were: 4.3 nm, 8.6 nm, and 12.3 nm as measured by ellipsometry.
